# Supplementary material for: Association between Variants of the Leptin Receptor Gene (LEPR) and Overweight: A Systematic Review and an Analysis of the CoLaus Study
Source: PLoS One. 2011 Oct 18;6(10):e26157. doi: 10.1371/journal.pone.0026157 (PMC3196514; doi:10.1371/journal.pone.0026157)
Supplement: Table S6 — Genotype and derived allele frequencies (D) for K109R, by ethnic group. (DOC) [file pone.0026157.s006.doc]

**Supporting Table S6:** genotype and derived allele frequencies (D) forK109R, by ethnic group

| **Reference** | **Frequency AA, n (%)** | **Frequency AD, n (%)** | **Frequency DD, n (%)** | **Frequency D, n** | **Frequency D, % (95% CI)** |
| --- | --- | --- | --- | --- | --- |
| **Caucasians** |  |  |  |  |  |
| Chung 1997 [1] |  |  |  | 55 | 20.99 (16.22-26.43) |
| Chagnon 1999 [2] | 157 (50.97) | 124 (40.26) | 27 (8.77) | 178 | 28.90 (25.34-32.65) |
| Oksanen 2000 [3] |  |  |  | 86 | 35.25 (29.26-41.60) |
| Mammes 2001 [4] |  |  |  | 193 | 24.94 (21.92-28.14) |
| Wauters 2001 [5] | 144 (51.80) | 113 (40.65) | 21 (7.55) | 155 | 27.88 (24.19-31.81) |
| Yiannakouris 2001 [6] | 90 (76.27) | 27 (22.88) | 1 (0.85) | 29 | 12.29 (8.39-17.17) |
| Van Rossum 2002 [7]a | 162 (52.26) | 117 (37.74) | 31 (10.00) | 179 | 28.87 (25.33-32.61) |
| Van Rossum 2002b | 150 (55.15) | 102 (37.50) | 20 (7.35) | 142 | 26.10 (22.46-30.01) |
| De Krom 2007 [8] | 168 (53.50) | 116 (36.94) | 30 (9.55) | 176 | 28.03 (24.54-31.72) |
| Fairbrother 2007 [9] | 625 (50.80) | 518 (42.10) | 87 (7.10) | 735 | 28.98 (27.22-30.79) |
| Den Hoed 2008 [10] | 45(43.70) | 52 (50.50) | 6 (5.80) | 64 | 31.07 (24.82-37.87) |
| Doecke 2008 [11] | 717 (53.00) | 513 (38.00) | 122 (9.00) | 757 | 27.74 (26.06-29.47) |
| Masuo 2008 [12] | 88 (68.22) | 38 (29.46) | 3 (2.33) | 44 | 17.05 (12.67-22.21) |
| Abete 2009 [13] | 110 (64.70) | 56 (32.90) | 4 (2.30) | 64 | 18.82 (14.81-23.39) |
| Marti 2009 [14] | 88 (61.54) | 50 (34.96) | 5 (3.50) | 60 | 20.98 (16.41-26.16) |
| Szczepankiewicz 2009 [15] | 65 (55.56) | 45 (38.46) | 7 (5.98) | 59 | 25.21 (19.78-31.28) |
| CoLaus men | 858 (61.02) | 460 (32.72) | 88 (6.26) | 636 | 22.62 (21.08-24.21) |
| CoLaus women | 1207 (62.90) | 605 (31.53) | 107 (5.58) | 819 | 21.34 (20.05-22.67) |
| *Heterogeneity* |  |  |  |  | *Q*=131.21 , p<0.01* |
| **Asians** |  |  |  |  |  |
| Chung 1997 [1] |  |  |  | 1 | 25.00 (0.63-80.59) |
| Matsuoka 1997 [16] |  |  |  | 104 | 76.47 (68.44-83.32) |
| Koh 2002 [17] | 7 (3.2) | 61 (27.85) | 151 (68.95) | 363 | 82.88 (79.02-86.29) |
| Ogawa 2004 [18]a | 5 (5.56) | 27 (30.00) | 58 (64.44) | 143 | 79.44 (72.80-85.09) |
| Ogawa 2004b | 6 (4.72) | 44 (34.65) | 77 (60.63) | 198 | 77.95 (72.35-82.89) |
| Woo 2006 [19] | 0 (0.00) | 14 (31.10) | 31 (68.90) | 76 | 84.44 (75.28-91.23) |
| Qu 2007 [20] | 19 (3.17) | 164 (27.38) | 416 (69.45) | 994 | 83.14 (80.90-85.22) |
| Han H.R. 2008 [21] | 11 (3.20) | 97 (28.30) | 235 (68.50) | 567 | 82.65 (79.61-85.41) |
| Kim 2008 [22] | 7 (2.66) | 71 (27.00) | 185 (70.34) | 441 | 83.84 (80.41-86.88) |
| Popruk 2008 [23] |  |  |  | 200 | 78.13 (72.55-83.03) |
| *Heterogeneity* |  |  |  |  | *Q*=10.47, p=0.314* |
| **Africans** |  |  |  |  |  |
| Chung 1997 [1] |  |  |  | 10 | 22.72 (11.47-37.84) |
| **Mixed populations** |  |  |  |  |  |
| Chung 1997 [1] |  |  |  | 18 | 23.08 (14.29-34.00) |
| Roth 2005 [24] | 33 (66.00) | 12 (24.00) | 5 (10.00) | 22 | 22.00 (14.33-31.39) |
| *Heterogeneity* |  |  |  |  | *Q*=0.02, p=0.893* |

* Q = Cochran’s Q statistic of heterogeneity

a women

b men

**References**

1. Chung WK, Power-Kehoe L, Chua M, Chu F, Aronne L et al. (1997) Exonic and intronic sequence variation in the human leptin receptor gene (LEPR). Diabetes 46: 1509-1511.

2. Chagnon YC, Chung WK, Perusse L, Chagnon M, Leibel RL et al. (1999) Linkages and associations between the leptin receptor (LEPR) gene and human body composition in the Quebec Family Study. International Journal of Obesity & Related Metabolic Disorders: Journal of the International Association for the Study of Obesity 23: 278-286.

3. Oksanen L, Tiitinen A, Kaprio J, Koistinen HA, Karonen S et al. (2000) No evidence for mutations of the leptin or leptin receptor genes in women with polycystic ovary syndrome. Mol Hum Reprod 6: 873-876.

4. Mammes O, Aubert R, Betoulle D, Pean F, Herbeth B et al. (2001) LEPR gene polymorphisms: associations with overweight, fat mass and response to diet in women. Eur J Clin Invest 31: 398-404.

5. Wauters M, Mertens I, Chagnon M, Rankinen T, Considine RV et al. (2001) Polymorphisms in the leptin receptor gene, body composition and fat distribution in overweight and obese women. International Journal of Obesity & Related Metabolic Disorders: Journal of the International Association for the Study of Obesity 25: 714-720.

6. Yiannakouris N, Yannakoulia M, Melistas L, Chan JL, Klimis-Zacas D et al. (2001) The Q223R polymorphism of the leptin receptor gene is significantly associated with obesity and predicts a small percentage of body weight and body composition variability. Journal of Clinical Endocrinology & Metabolism 86: 4434-4439.

7. van Rossum CT, Hoebee B, Seidell JC, Bouchard C, van Baak MA et al. (2002) Genetic factors as predictors of weight gain in young adult Dutch men and women. International Journal of Obesity & Related Metabolic Disorders: Journal of the International Association for the Study of Obesity 26: 517-528.

8. de Krom M, van der Schouw YT, Hendriks J, Ophoff RA, van Gils CH et al. (2007) Common genetic variations in CCK, leptin, and leptin receptor genes are associated with specific human eating patterns. Diabetes 56: 276-280.

9. Fairbrother UL, Tanko LB, Walley AJ, Christiansen C, Froguel P et al. (2007) Leptin receptor genotype at Gln223Arg is associated with body composition, BMD, and vertebral fracture in postmenopausal Danish women. Journal of Bone & Mineral Research 22: 544-550.

10. den Hoed M, Smeets AJ, Veldhorst MA, Nieuwenhuizen AG, Bouwman FG et al. (2008) SNP analyses of postprandial responses in (an)orexigenic hormones and feelings of hunger reveal long-term physiological adaptations to facilitate homeostasis. Int J Obes (Lond) 32: 1790-1798.

11. Doecke JD, Zhao ZZ, Stark MS, Green AC, Hayward NK et al. (2008) Single nucleotide polymorphisms in obesity-related genes and the risk of esophageal cancers. Cancer Epidemiology, Biomarkers & Prevention 17: 1007-1012.

12. Masuo K, Straznicky NE, Lambert GW, Katsuya T, Sugimoto K et al. (2008) Leptin-receptor polymorphisms relate to obesity through blunted leptin-mediated sympathetic nerve activation in a Caucasian male population.[see comment]. Hypertension Research - Clinical & Experimental 31: 1093-1100.

13. Abete I, Goyenechea E, Crujeiras AB, Martinez JA (2009) Inflammatory State and Stress Condition in Weight-lowering Lys109Arg LEPR Gene Polymorphism Carriers. Arch Med Res 40: 306-310.

14. Marti A, Santos JL, Gratacos M, Moreno-Aliaga MJ, Maiz A et al. (2009) Association between leptin receptor (LEPR) and brain-derived neurotrophic factor (BDNF) gene variants and obesity: a case-control study. Nutr Neurosci 12: 183-188.

15. Szczepankiewicz A, Breborowicz A, Sobkowiak P, Popiel A (2009) Are genes associated with energy metabolism important in asthma and BMI? J Asthma 46: 53-58.

16. Matsuoka N, Ogawa Y, Hosoda K, Matsuda J, Masuzaki H et al. (1997) Human leptin receptor gene in obese Japanese subjects: evidence against either obesity-causing mutations or association of sequence variants with obesity. Diabetologia 40: 1204-1210.

17. Koh JM, Kim DJ, Hong JS, Park JY, Lee KU et al. (2002) Estrogen receptor alpha gene polymorphisms Pvu II and Xba I influence association between leptin receptor gene polymorphism (Gln223Arg) and bone mineral density in young men. Eur J Endocrinol 147: 777-783.

18. Ogawa T, Hirose H, Yamamoto Y, Nishikai K, Miyashita K et al. (2004) Relationships between serum soluble leptin receptor level and serum leptin and adiponectin levels, insulin resistance index, lipid profile, and leptin receptor gene polymorphisms in the Japanese population. Metabolism: Clinical & Experimental 53: 879-885.

19. Woo HY, Park H, Ki CS, Park YL, Bae WG (2006) Relationships among serum leptin, leptin receptor gene polymorphisms, and breast cancer in Korea. Cancer Lett 237: 137-142.

20. Qu Y, Yang Z, Jin F, Sun L, Zhang C et al. (2007) Analysis of the relationship between three coding polymorphisms in LEPR gene and obesity in northern Chinese. Obes Res Clin Pract 1: 261-266.

21. Han HR, Ryu HJ, Cha HS, Go MJ, Ahn Y et al. (2008) Genetic variations in the leptin and leptin receptor genes are associated with type 2 diabetes mellitus and metabolic traits in the Korean female population. Clin Genet 74: 105-115.

22. Kim SM, Kim SH, Lee JR, Jee BC, Ku SY et al. (2008) Association of leptin receptor polymorphisms Lys109Arg and Gln223Arg with serum leptin profile and bone mineral density in Korean women. Am J Obstet Gynecol 198: 421-428.

23. Popruk S, Tungtrongchitr R, Petmitr S, Pongpaew P, Harnroongroj T et al. (2008) Leptin, soluble leptin receptor, lipid profiles, and LEPR gene polymorphisms in Thai children and adolescents. International Journal for Vitamin & Nutrition Research 78: 9-15.

24. Roth MJ, Paltoo DN, Albert PS, Baer DJ, Judd JT et al. (2005) Common leptin receptor polymorphisms do not modify the effect of alcohol ingestion on serum leptin levels in a controlled feeding and alcohol ingestion study. Cancer Epidemiology, Biomarkers & Prevention 14: 1576-1578.
